# Supplementary material
Source: Elsevier journal article supplement (https://www.sciencedirect.com/science/article/pii/S0214916819300464)
Supplement: mmc1 [file S0214916819300464:mmc1.pdf]

## Estándares SEA 2019 para el control global del riesgo cardiovascular

### ANEXOS

#### Anexo 1. Cuestionario de Edimburgo

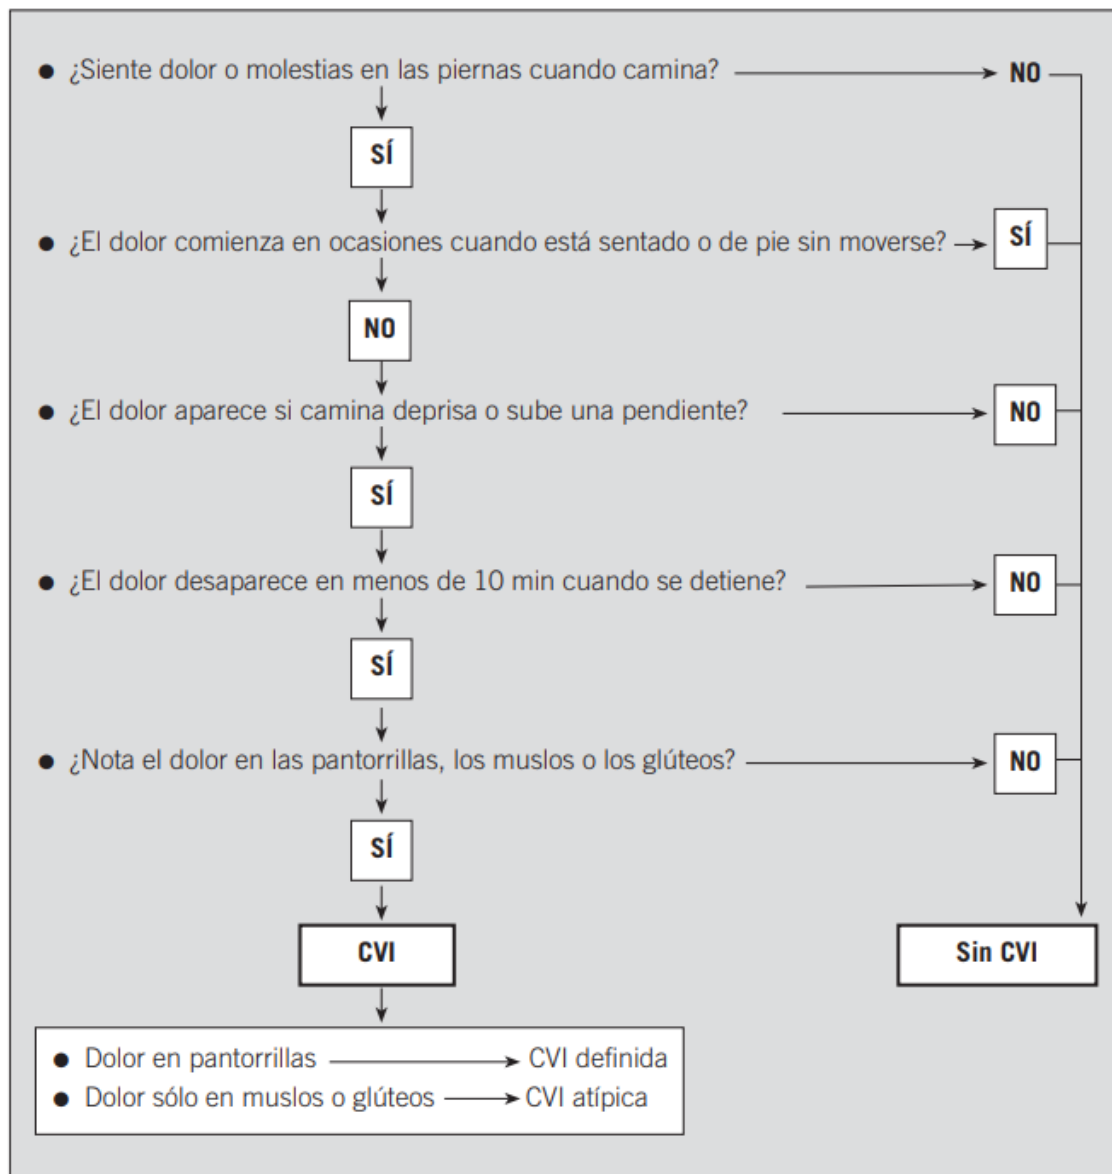

## Estándares SEA 2019 para el control global del riesgo cardiovascular

### Anexo 2. Cuestionario de disfunción eréctil (SQUED)

La población diana es la población varón general.

**1. Durante los últimos 6 meses, ¿con qué frecuencia le ha sido posible la penetración?**

- Ni lo intentó
- Nunca
- Menos de la mitad de las veces
- Aproximadamente la mitad de las veces
- Más de la mitad de las veces
- Casi siempre o siempre

**2. Durante los últimos 6 meses, ¿con qué frecuencia le ha sido posible mantener la erección hasta finalizar el acto sexual?**

- Ni lo intentó
- Nunca
- Menos de la mitad de las veces
- Aproximadamente la mitad de las veces
- Más de la mitad de las veces
- Casi siempre o siempre

**3. Cuando intentó el acto sexual, ¿con qué frecuencia fue satisfactorio para usted?**

- Ni lo intentó
- Nunca
- Menos de la mitad de las veces
- Aproximadamente la mitad de las veces
- Más de la mitad de las veces
- Casi siempre o siempre

El rango de puntuación se encuentra entre 0 y 15 puntos. Una puntuación igual o superior a 12 sugiere disfunción eréctil. Las puntuaciones que corresponden a cada opción de respuesta son las siguientes.

- Ni lo intentó **(0)**
- Nunca **(1)**
- Menos de la mitad de las veces **(2)**
- Aproximadamente la mitad de las veces **(3)**
- Más de la mitad de las veces **(4)**
- Casi siempre o siempre **(5)**

## Estándares SEA 2019 para el control global del riesgo cardiovascular

### Anexo 3. Test de Fargeström de dependencia a la nicotina

| PREGUNTA                                                                                       | RESPUESTA                                          | PUNTUACIÓN |
|------------------------------------------------------------------------------------------------|----------------------------------------------------|------------|
| ¿Cuánto tiempo tarda en fumarse su primer cigarrillo desde que se despierta por la mañana?     | Más de 60 minutos                                  | 0          |
|                                                                                                | De 31 a 60 minutos                                 | 1          |
|                                                                                                | De 6 a 30 minutos                                  | 2          |
|                                                                                                | No más de 5 minutos                                | 3          |
| ¿Le resulta difícil abstenerse de fumar en lugares donde está prohibido?                       | No                                                 | 0          |
|                                                                                                | Sí                                                 | 1          |
| ¿Qué cigarrillo le cuesta más no fumárselo?                                                    | El primero de la mañana                            | 1          |
|                                                                                                | Cualquier otro                                     | 0          |
| ¿Cuántos cigarrillos fuma al día?                                                              | De 1 a 10                                          | 0          |
|                                                                                                | De 11 a 20                                         | 1          |
|                                                                                                | De 21 a 30                                         | 2          |
|                                                                                                | 31 o más                                           | 3          |
| ¿Fuma más durante las primeras horas después de levantarse que durante el resto de la jornada? | No                                                 | 0          |
|                                                                                                | Sí                                                 | 1          |
| ¿Fuma cuándo está enfermo y debe permanecer en cama gran parte del día?                        | No                                                 | 0          |
|                                                                                                | Sí                                                 | 1          |
| ¿Qué tipo de tabaco fuma?                                                                      | Bajo en nicotina                                   | 0          |
|                                                                                                | Medio (1,0-1,2 mg)                                 | 1          |
|                                                                                                | Alto (> 1,2mg)                                     | 2          |
| <b>PUNTUACION</b>                                                                              |                                                    |            |
| Entre 0 y 4                                                                                    | El fumador es poco dependiente de la nicotina      |            |
| Puntuación entre 5 ó 6                                                                         | El fumador tiene una dependencia media             |            |
| Puntuación entre 7 y 10                                                                        | El fumador es altamente dependiente de la nicotina |            |

Carrasco Giménez TJ, Luna Adame M, Vila Castellar J. Validez del Fagerstrom Tolerance Questionnaire como medida de dependencia física de la nicotina: una revisión. Rev Española Drog ISSN 0213-7615, No 1, 1994, Págs 3-14 1994;19:3-14.

Lee D, D'Alonzo G. Cigarette smoking, nicotine addiction, and its pharmacologic treatment. Arch Intern Med 1993;153:34-48.

## Estándares SEA 2019 para el control global del riesgo cardiovascular

### Anexo 4. Puntuación de dieta mediterránea (MEDAS) - Estudio PREDIMED

|                                                                                                                                                                                                                                              |
|----------------------------------------------------------------------------------------------------------------------------------------------------------------------------------------------------------------------------------------------|
| 1. ¿Usa usted el aceite de oliva como principal grasa para cocinar?<br>Sí = 1 punto                                                                                                                                                          |
| 2. ¿Cuánto aceite de oliva consume en total al día (incluyendo el usado para freír, comidas fuera de casa, ensaladas, etc.)?<br>4 o más cucharadas = 1 punto                                                                                 |
| 3. ¿Cuántas raciones de verdura u hortalizas consume al día?<br>(las guarniciones o acompañamientos = ½ ración) 1 ración = 200g.<br>2 o más (al menos una de ellas en ensalada o crudas) = 1 punto                                           |
| 4. ¿Cuántas piezas de fruta (incluyendo zumo natural) consume al día?<br>3 o más al día = 1 punto                                                                                                                                            |
| 5. ¿Cuántas raciones de carne roja, hamburguesa, salchichas o embutidos consume al día?<br>(ración: 100-150g)<br>Menos de 1 al día = 1 punto                                                                                                 |
| 6. ¿Cuántas raciones de mantequilla, margarina o nata consume al día?<br>(porción individual: 12 g)<br>Menos de 1 al día = 1 punto                                                                                                           |
| 7. ¿Cuántas bebidas carbonatadas y/o azucaradas (refrescos, colas, tónicas, bitter) consume al día?<br>Menos de 1 al día = 1 punto                                                                                                           |
| 8. ¿Bebe usted vino? ¿Cuánto consume a la semana?<br>7 o más vasos a la semana = 1 punto                                                                                                                                                     |
| 9. ¿Cuántas raciones de legumbres consume a la semana?<br>(1 plato o ración de 150g)<br>3 o más a la semana = 1 punto                                                                                                                        |
| 10. ¿Cuántas raciones de pescado-mariscos consume a la semana?<br>(1 plato pieza o ración: 100-150g de pescado o 4-5 piezas o 200g de marisco)<br>3 o más a la semana = 1 punto                                                              |
| 11. ¿Cuántas veces consume repostería comercial (no casera) como galletas, flanes, dulce o pasteles a la semana?<br>Menos de 2 a la semana = 1 punto                                                                                         |
| 12. ¿Cuántas veces consume frutos secos a la semana?<br>(ración 30 g)<br>3 o más a la semana = 1 punto                                                                                                                                       |
| 13. ¿Consume usted preferentemente carne de pollo, pavo o conejo en vez de ternera, cerdo, hamburguesas o salchichas?<br>(carne de pollo: 1 pieza o ración de 100-150g)<br>Sí = 1 punto                                                      |
| 14. ¿Cuántas veces a la semana consume los vegetales cocinados, la pasta, arroz u otros platos aderezados con salsa de tomate, ajo, cebolla o puerro elaborada a fuego lento con aceite de oliva (sofrito)?<br>2 o más a la semana = 1 punto |
| <b>PUNTUACIÓN TOTAL</b><br><br>< 9 = Baja adherencia<br>≥ 9 = Buena adherencia                                                                                                                                                               |

## Estándares SEA 2019 para el control global del riesgo cardiovascular

### Anexo 5. Cuestionario de ejercicio IPAQ

|                                                                                                                                                                                               |  |
|-----------------------------------------------------------------------------------------------------------------------------------------------------------------------------------------------|--|
| <b>1. Durante los últimos 7 días, ¿en cuántos realizó actividades físicas intensas tales como levantar pesos pesados, cavar, ejercicios hacer aeróbicos o andar rápido en bicicleta?</b>      |  |
| Días por semana (indique el número)                                                                                                                                                           |  |
| Ninguna actividad física intensa (pase a la pregunta 3)                                                                                                                                       |  |
| <b>2. Habitualmente, ¿cuánto tiempo en total dedicó a una actividad física intensa en uno de esos días?</b>                                                                                   |  |
| Indique cuántas horas por día                                                                                                                                                                 |  |
| Indique cuántos minutos por día                                                                                                                                                               |  |
| No sabe/no está seguro                                                                                                                                                                        |  |
| <b>3. Durante los últimos 7 días, ¿en cuántos días hizo actividades físicas moderadas tales como transportar pesos livianos, o andar en bicicleta a velocidad regular? No incluya caminar</b> |  |
| Días por semana (indicar el número)                                                                                                                                                           |  |
| Ninguna actividad física moderada (pase a la pregunta 5)                                                                                                                                      |  |
| <b>4. Habitualmente, ¿cuánto tiempo en total dedicó a una actividad física moderada en uno de esos días? Indique cuántas horas por día</b>                                                    |  |
| Indique cuántos minutos por día                                                                                                                                                               |  |
| No sabe/no está seguro                                                                                                                                                                        |  |
| <b>5. Durante los últimos 7 días, ¿en cuántos días caminó por lo menos 10 minutos seguidos?</b>                                                                                               |  |
| Días por semana (indique el número)                                                                                                                                                           |  |
| Ninguna caminata (pase a la pregunta 7)                                                                                                                                                       |  |
| <b>6. Habitualmente, ¿cuánto tiempo en total dedicó a caminar en uno de esos días?</b>                                                                                                        |  |
| Indique cuántas horas por día                                                                                                                                                                 |  |
| Indique cuántos minutos por día                                                                                                                                                               |  |
| No sabe/no está seguro                                                                                                                                                                        |  |
| <b>7. Durante los últimos 7 días, ¿cuánto tiempo pasó sentado durante un día hábil?</b>                                                                                                       |  |
| Indique cuántas horas por día                                                                                                                                                                 |  |
| Indique cuántos minutos por día                                                                                                                                                               |  |
| No sabe/no está seguro                                                                                                                                                                        |  |

## Estándares SEA 2019 para el control global del riesgo cardiovascular

### VALOR DEL TEST

1. Caminatas:  $3'3 \text{ MET}^* \times \text{minutos de caminata} \times \text{días por semana}$  (Ej.  $3'3 \times 30 \text{ minutos} \times 5 \text{ días} = 495 \text{ MET}$ )
2. Actividad Física Moderada:  $4 \text{ MET}^* \times \text{minutos} \times \text{días por semana}$
3. Actividad Física Vigorosa:  $8 \text{ MET}^* \times \text{minutos} \times \text{días por semana}$

**A continuación, sume los tres valores obtenidos: Total = caminata + actividad física moderada + actividad física vigorosa**

### CRITERIOS DECLASIFICACIÓN:

Actividad Física Moderada:

- 3 o más días de actividad física vigorosa por lo menos 20 minutos por día
- 5 o más días de actividad física moderada y/o caminata al menos 30 minutos por día
- 5 o más días de cualquiera de las combinaciones de caminata, actividad física moderada o vigorosa logrando como mínimo un total de 600 MET\*

Actividad Física Vigorosa

- Actividad Física Vigorosa por lo menos 3 días por semana logrando un total de al menos 1500 MET\*
- 7 días de cualquier combinación de caminata, con actividad física moderada y/o actividad física vigorosa, logrando un total de al menos 3000 MET\*

\* Unidad de medida del test

**RESULTADO: NIVEL DE ACTIVIDAD** (señale el que proceda)

☐ NIVEL ALTO

☐ NIVEL MODERADO

☐ NIVEL BAJO O INACTIVO

## Estándares SEA 2019 para el control global del riesgo cardiovascular

### Anexo 6. Criterios de la DLCN (*Dutch Lipid Clinic Network*)

|                                                                                                               |     |
|---------------------------------------------------------------------------------------------------------------|-----|
| <b>Historial familiar</b>                                                                                     |     |
| - Familiar de 1er grado con antecedentes de CI precoz y/ó                                                     | 1   |
| - Familiar de 1er grado con C-LDL > percentil 95                                                              |     |
| - Familiar de 1er grado con xantomas y/o arco corneal y/ó                                                     | 2   |
| - Niños < 18 años con c-LDL > percentil 95                                                                    |     |
| <b>Historia personal</b>                                                                                      |     |
| - Evidencia de enfermedad coronaria prematura                                                                 | 2   |
| - Evidencia de enfermedad cerebrovascular o periférica prematura                                              | 1   |
| <b>Examen físico</b>                                                                                          |     |
| - Xantomas tendinosos                                                                                         | 6   |
| - Arco corneal < 45 años                                                                                      | 4   |
| <b>Analítica</b>                                                                                              |     |
| - C-LDL > 330 mg/dL (> 8,5 mmol/L)                                                                            | 8   |
| - C-LDL 250-329 mg/dL (6,5 - 8,4 mmol/L)                                                                      | 5   |
| - C-LDL 190-249 mg/dL (5,0 - 6,4 mmol/L)                                                                      | 3   |
| - C-LDL < 190 mg/dL (> 5,0 mmol/L)                                                                            | 1   |
| <b>Análisis genético</b>                                                                                      |     |
| Mutación conocida del gen del receptor de las LDL                                                             | 8   |
| <b>PUNTUACIÓN</b>                                                                                             |     |
| HF definida                                                                                                   | >8  |
| HF probable                                                                                                   | 6-8 |
| HF posible                                                                                                    | 3-5 |
| HF improbable                                                                                                 | <3  |
| CI: Cardiopatía isquémica; C-LDL: colesterol de lipoproteínas baja densidad; HF: hipercolesterolemia familiar |     |
